# Supplementary material
Source: PubMed Central journal article supplement (PMC5095223)
Supplement: rsif20160659supp1.pdf [file rsif20160659supp1.pdf]

## **Supporting Information**

### **Characterizing the reproduction number of epidemics with early sub-exponential growth dynamics<sup>1</sup>**

Gerardo Chowell<sup>1,2</sup>, Cécile Viboud<sup>2</sup>, Lone Simonsen<sup>3,4</sup>, Seyed M. Moghadas<sup>5</sup>

<sup>1</sup> School of Public Health, Georgia State University, Atlanta, GA, USA

<sup>2</sup> Division of International Epidemiology and Population Studies, Fogarty International Center, National Institutes of Health, Bethesda, MD, USA

<sup>3</sup> Department of Public health, University of Copenhagen, Copenhagen, Denmark

<sup>4</sup> Department of Global Health, School of Public Health and Health Services, George Washington University, Washington DC, USA

<sup>5</sup> Agent Based Modelling Laboratory, York University, Toronto, Canada.

---

<sup>1</sup> *Chowell, Viboud, Simonsen, Moghadas. J. R. Soc. Interface, 2016*

***Alternative formulation of the generalized-growth model (GGM)***

Here we derive an alternative formulation of the generalized-growth model where the biological factor acts on the growth rate  $r$  rather than  $C$ . The original generalized-growth model is given by [1]:

$$C' = rC^p \quad (2.1)$$

where  $C'(t)$  describes the incidence curve over time  $t$ , the solution  $C(t)$  describes the cumulative number of cases at time  $t$ ,  $r$  is a positive parameter denoting the growth rate (with the units of (people)<sup>1-p</sup> per time), and  $p \in [0,1]$  is a 'deceleration of growth' parameter (dimensionless).

We first apply a change of variable  $u = \log(C)$  so that  $C = e^u$ . Then the model becomes:

$$u' = re^{u(p-1)}$$

The solution of this model is given by:

$$u(t) = \begin{cases} rt & p = 1 \\ \frac{1}{1-p} \log(r(1-p)t + e^{u_0(1-p)}) & 0 \leq p < 1 \end{cases}$$

where  $u_0 = \log(C_0)$ . The rate of change of the growth rate in the original generalized-growth model (Equation 1) is given by:

$$u'(t) = \begin{cases} r & p = 1 \\ \frac{r}{r(1-p)t + e^{u_0(1-p)}} & 0 \leq p < 1 \end{cases}$$

Hence, the alternative formulation of the generalized-growth model is given by:

$$C'(t) = u'(t)C(t)$$

$$\text{where } u'(t) = \begin{cases} \frac{r}{r(1-p)t + e^{\log(C_0)(1-p)}} & 0 \leq p < 1 \\ r & p = 1 \end{cases}$$

The same numerical results are obtained from both formulations of the generalized growth model as shown in Figure S1.

**Figure S1.** Comparison of the numerical results derived from both formulations of the generalized-growth model for different values of  $p$  when  $r = 1.5$  and  $C_0 = 1$ .

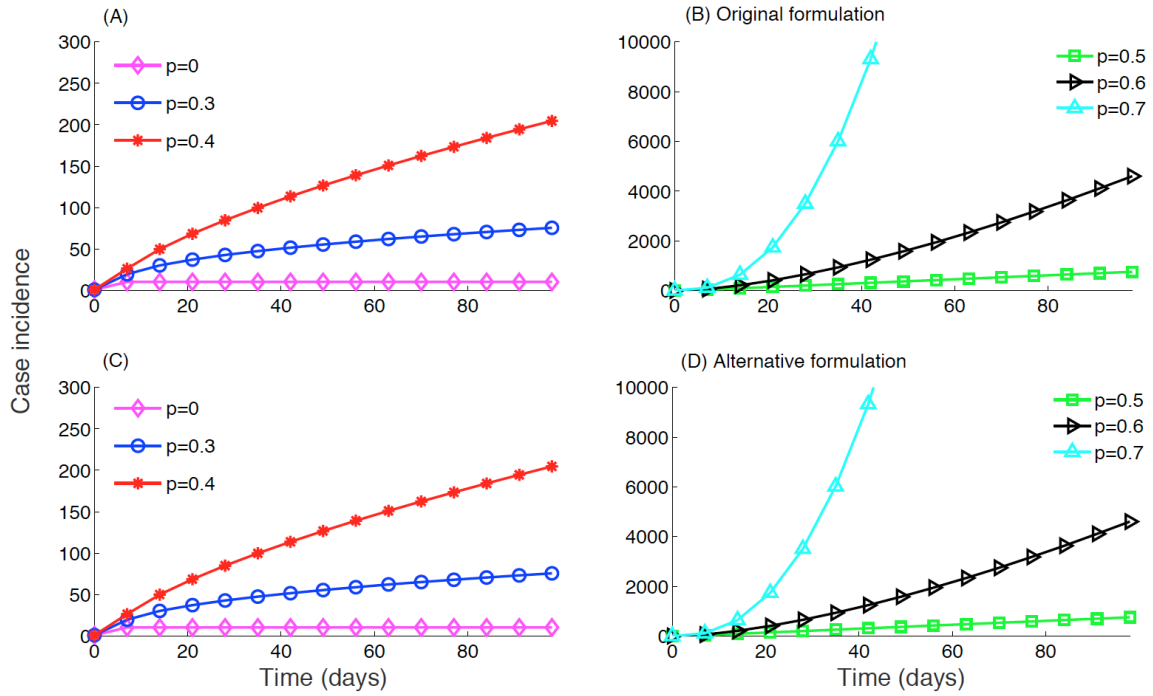

**Mathematical proof for  $R_g^{subexp} \rightarrow e^{rT_g}$  as  $p \rightarrow 1^-$**

Using methods of limit, one can easily show that the reproduction number  $R_g^{subexp}$  according to disease generations converges to  $e^{rT_g}$  as  $p \rightarrow 1^-$  as follows:

$$R_g^{subexp} = \left[ 1 + \frac{r(1-p)T_g}{r(1-p)gT_g + C_0^{1-p}} \right]^{1-p} \quad (2.6)$$

If  $p \rightarrow 1^-$  then  $R_g^{subexp} \approx 1^\infty$

Taking the logarithm on both sides we obtain (when  $C_0 \neq 0$ ):

$$\ln(R_g^{subexp}) = \frac{p}{1-p} \ln \left[ 1 + \frac{r(1-p)T_g}{r(1-p)gT_g + C_0^{1-p}} \right] \approx \frac{0}{0} \text{ when } p \rightarrow 1^-$$

Applying L'Hospital's Rule, we obtain:

$$y = \frac{1 \left[ \frac{-rT_g[1] - \frac{0}{1^2}}{1+0} \right]^0}{-1} = \frac{-rT_g}{-1} = rT_g$$

as  $p \rightarrow 1^-$ . Then  $\lim_{p \rightarrow 1^-} R_g^{subexp} = e^{rT_g}$

Putting everything together, we have:

$$R_g^{subexp} = \begin{cases} 1 & \text{If } g \rightarrow \infty \text{ and } p < 1 \\ e^{rT_g} & \text{If } p \rightarrow 1^- \end{cases}$$

**Figure S2.** Simulated profiles of the effective reproduction number during the first 5 generation intervals derived from case incidence curves of the generalized-growth model with different values of the growth rate ( $r$ ) and the deceleration of growth parameter ( $p$ ). The initial number of cases is set to  $C(0)=1$ . Estimates of the effective reproduction number are generated assuming a fixed generation interval at 3 days.

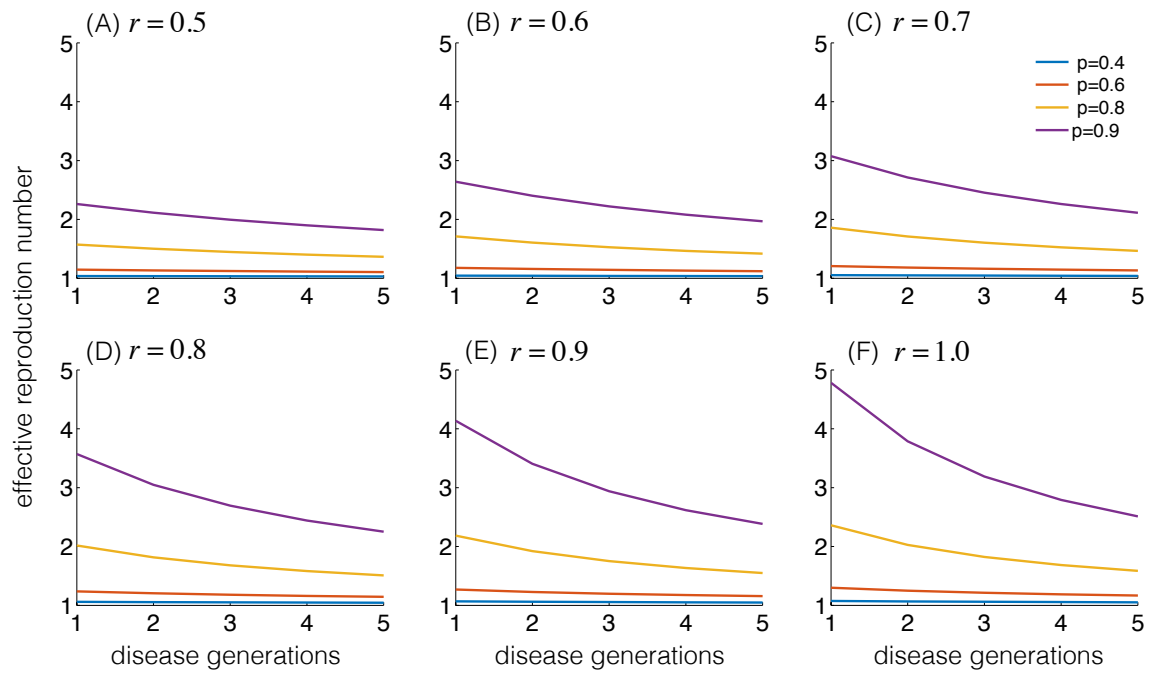

**Figure S3.** Simulations of the early epidemic growth phase derived from the SIR model described by Equations (2.10) for different values of the power-law scaling parameter  $\alpha$ ,  $\gamma = \frac{1}{5}$ , and (A)  $\beta_0 = 0.4$ , (B)  $\beta_0 = 0.48$ , (C)  $\beta_0 = 0.56$ , and (D)  $\beta_0 = 0.6$  with a large population size  $N$  set at  $10^8$ . The epidemic simulations start with one infectious individual. In semi-logarithmic scale, exponential growth is evident if a straight line fits well several consecutive disease generations of the epidemic curve, whereas a strong downward curvature in semi-logarithmic scale is indicative of sub-exponential growth. Our simulations show that case incidence curves display early sub-exponential growth dynamics even for values of  $\alpha$  slightly below 1.0.

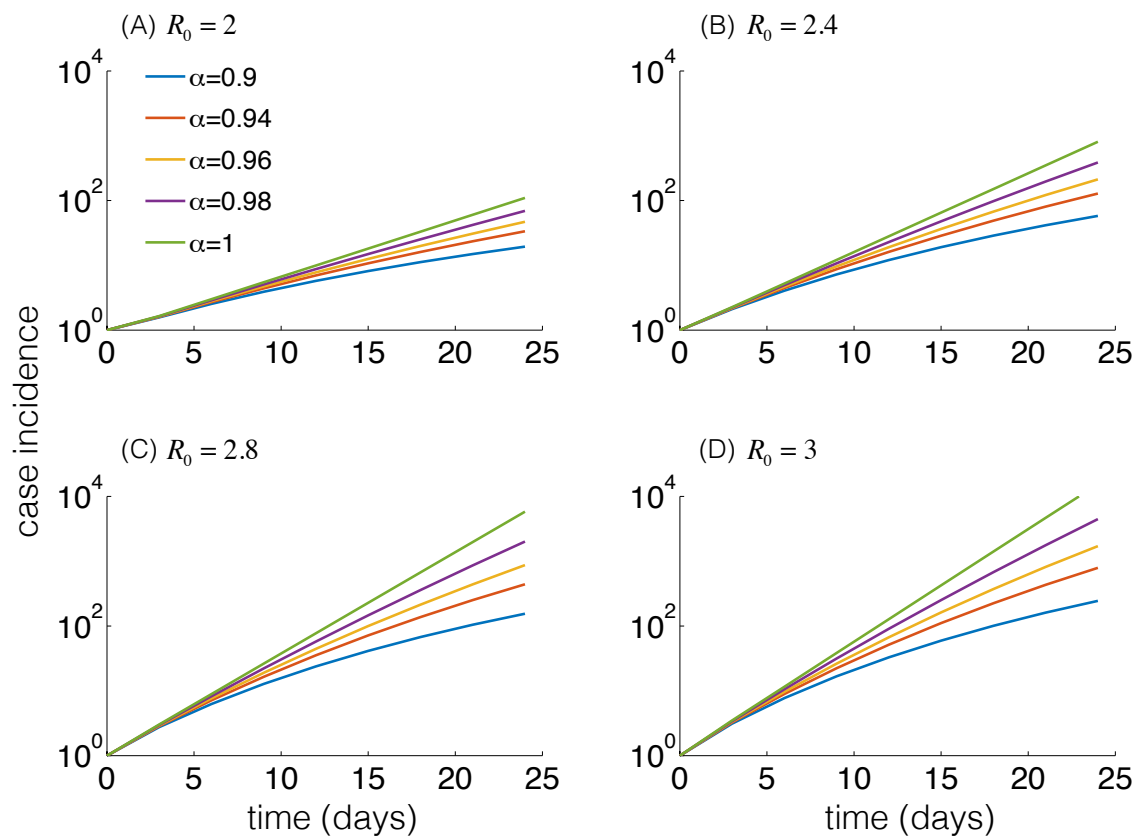

**Figure S4.** Examples of the fits provided by the exponential and generalized-growth models to three infectious disease outbreaks (pandemic influenza in San Francisco in 1918, HIV/AIDS epidemic in Japan, and Ebola epidemic in Western Urban, Sierra Leone in 2014).

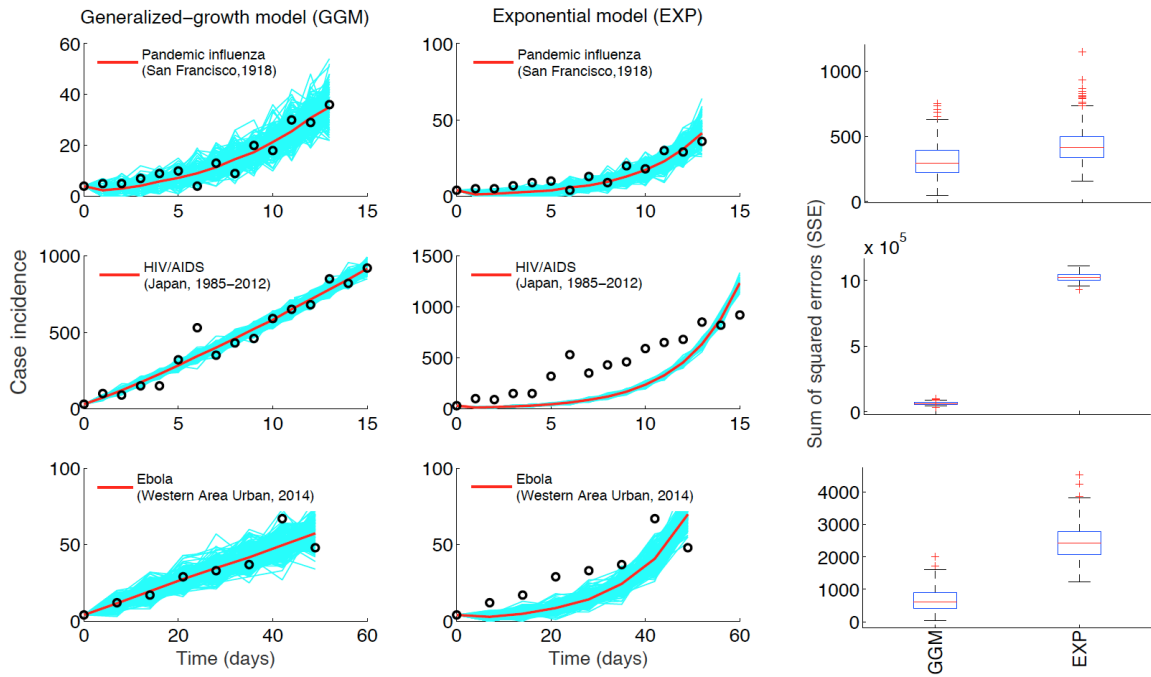

**Figure S5.** Comparison of the goodness of fit provided by the exponential and the generalized-growth models across all of the 21 infectious disease outbreaks (see Table 1).

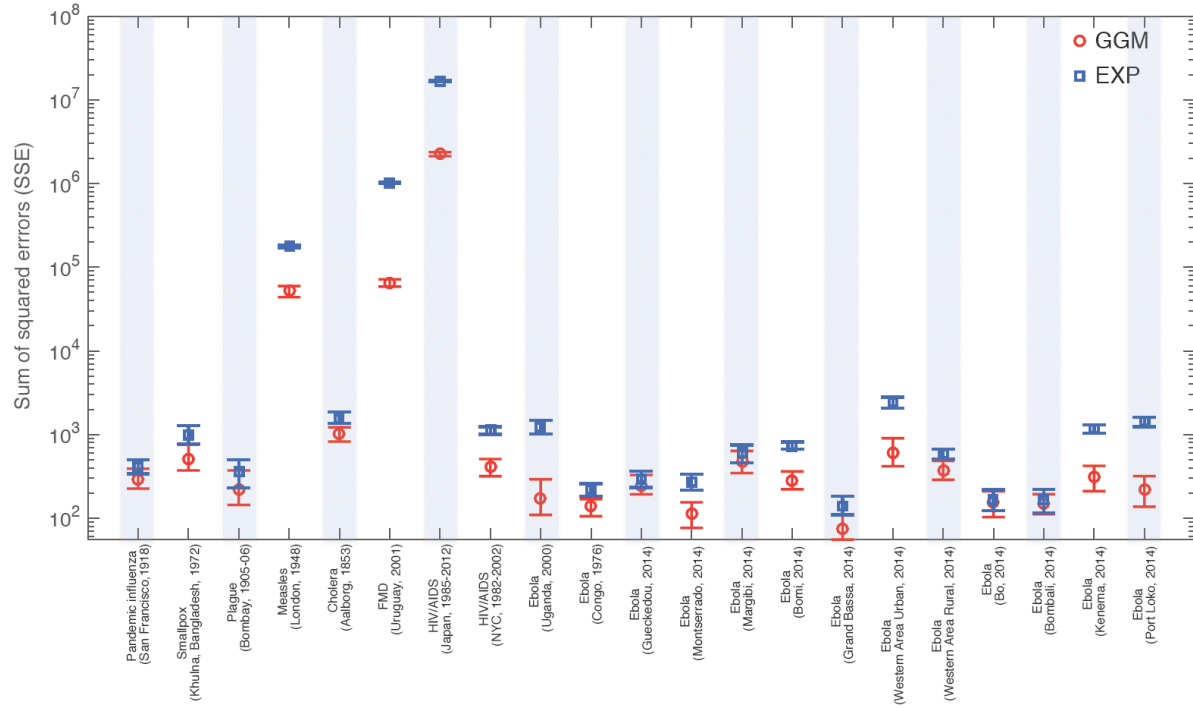



**Figure S6.** Mean estimates of the effective reproduction number and the deceleration of growth parameter  $p$  derived from our sample of infectious disease datasets (Table 1) were significantly correlated for three estimation periods with an initial phase length comprising 3 to 5 generation intervals.

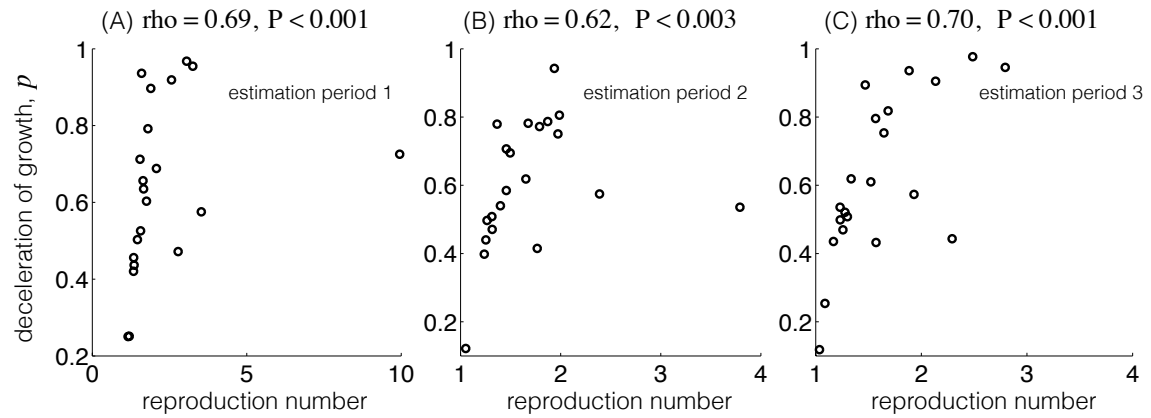

**Figure S7. The 1918 influenza pandemic in San Francisco.** Estimates and 95% confidence intervals of the effective reproduction number derived from fitting the generalized-growth model to an increasing length of the early epidemic phase comprising of approximately 3-5 disease generation intervals. The generation interval is assumed to be gamma distributed with the mean of 3 days and standard deviation of 1 day. Estimates and 95% confidence intervals for parameters  $r$  and  $p$  are also shown.

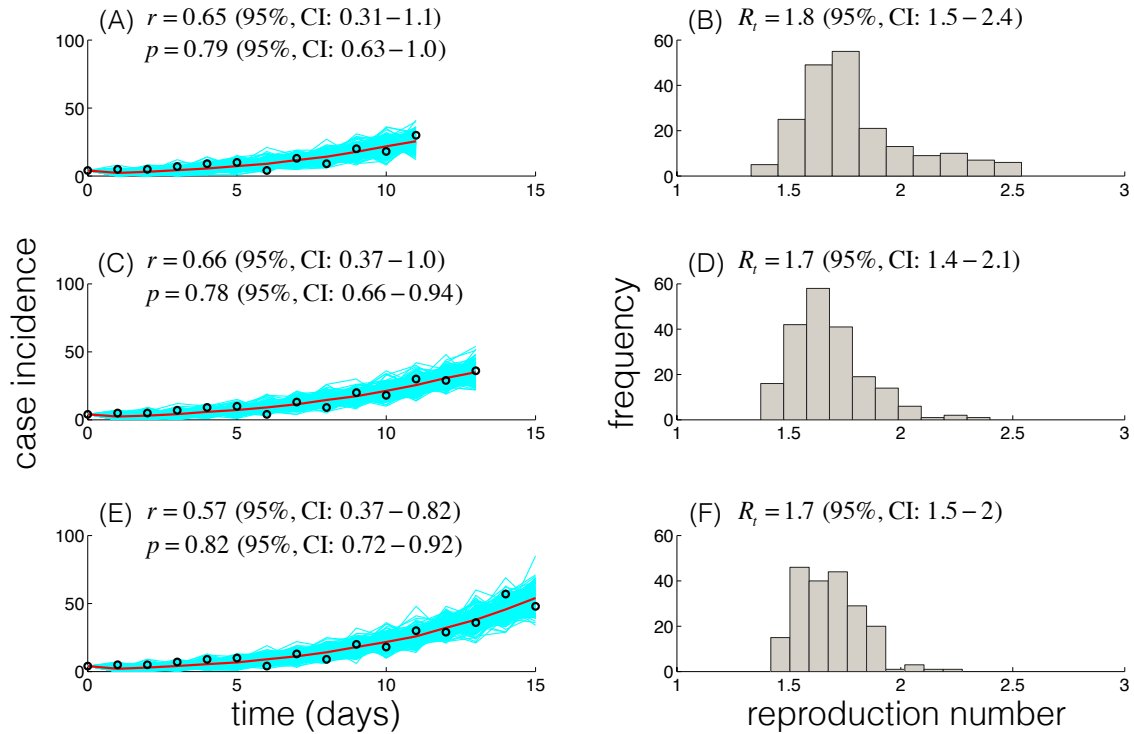

**Figure S8. The 2001 foot-and-mouth disease epidemic in Uruguay.**

Estimates and 95% confidence intervals of the effective reproduction number derived from fitting the generalized-growth model to an increasing length of the early epidemic phase comprising of approximately 3-5 disease generation intervals. The generation interval is assumed to be gamma distributed with the mean of 5 days and standard deviation of 1 day. Estimates and 95% confidence intervals for parameters  $r$  and  $p$  are also shown.

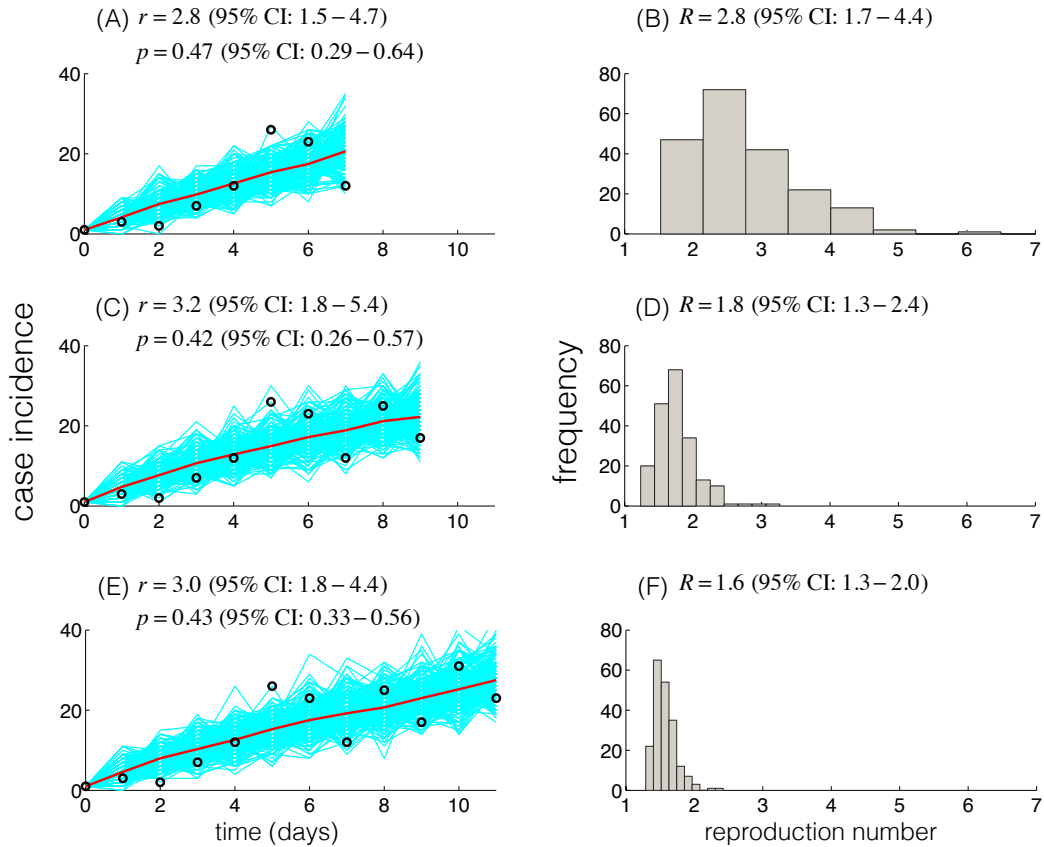

**Figure S9. The HIV/AIDS epidemic in Japan (1985-2012).**

Estimates and 95% confidence intervals of the effective reproduction number derived from fitting the generalized-growth model to an increasing length of the early epidemic phase comprising of approximately 3-5 disease generation intervals. The generation interval is assumed to be gamma distributed with the mean of 4 years and standard deviation of 1.4 years. Estimates and 95% confidence intervals for parameters  $r$  and  $p$  are also shown.

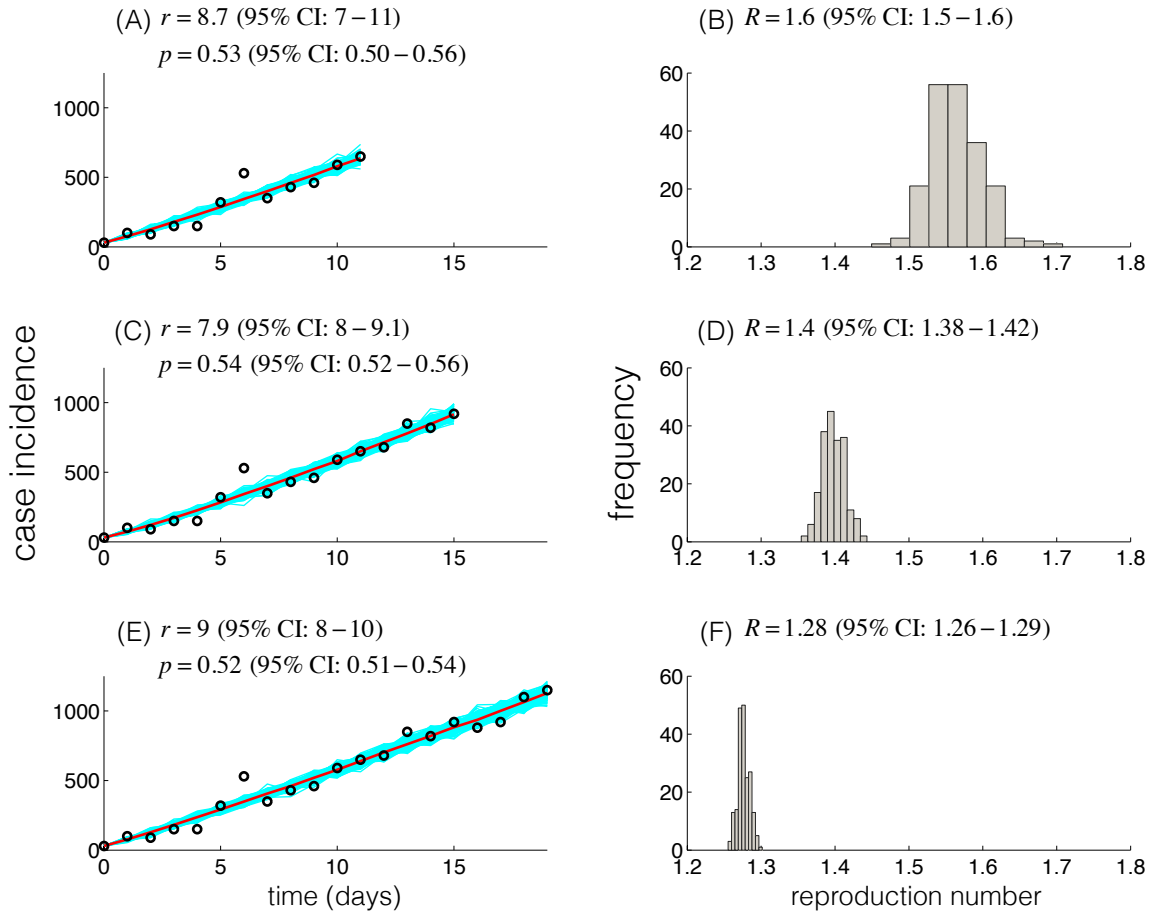

**Figure S10. The 2014-15 Ebola epidemic in Gueckedou, Guinea.**

Estimates and 95% confidence intervals of the effective reproduction number derived from fitting the generalized-growth model to an increasing length of the early epidemic phase comprising of approximately 3-5 disease generation intervals. The generation interval is assumed to be gamma distributed with the mean of 19 days and standard deviation of 11 days. Estimates and 95% confidence intervals for parameters  $r$  and  $p$  are also shown.

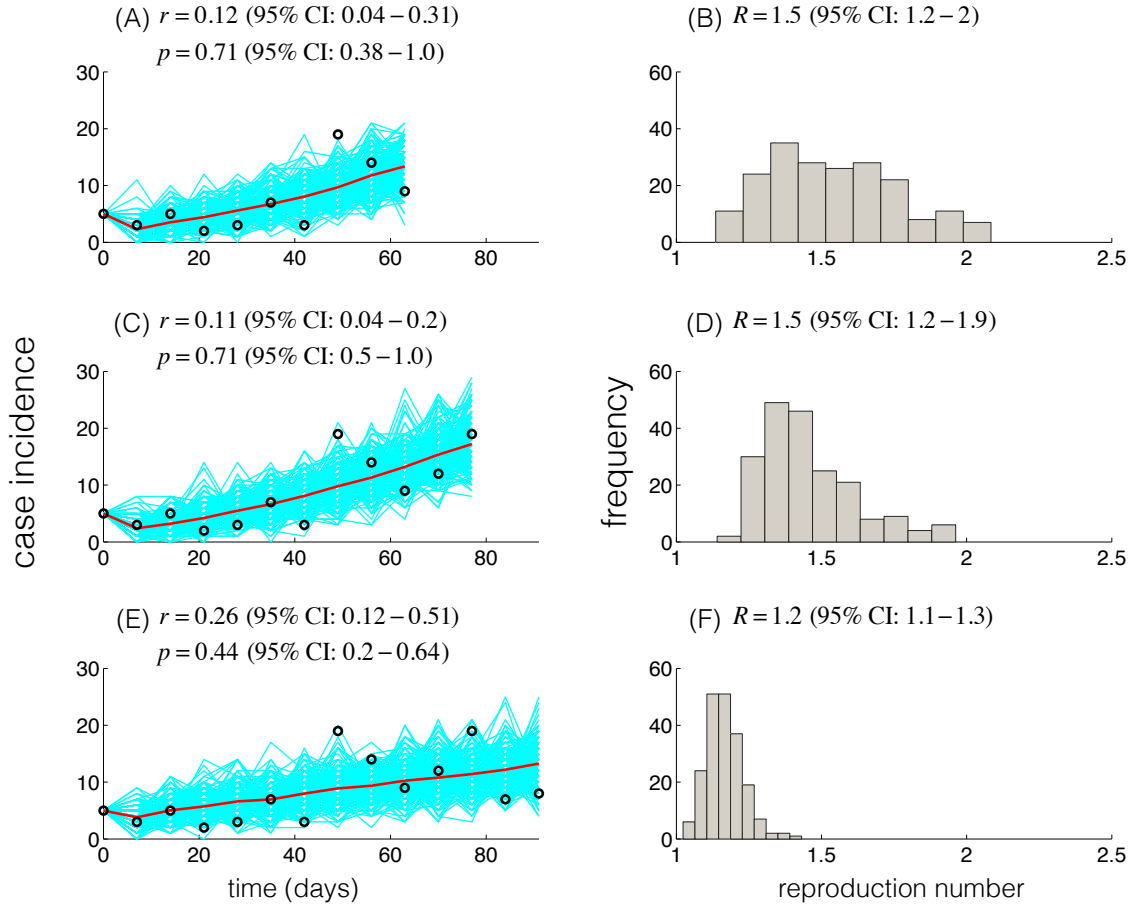

**Figure S11. The 2014-15 Ebola epidemic in Western Area Urban, Sierra Leone.** Estimates and 95% confidence intervals of the effective reproduction number derived from fitting the generalized-growth model to an increasing length of the early epidemic phase comprising of approximately 3-5 disease generation intervals. The generation interval is assumed to be gamma distributed with the mean of 11.6 days and standard deviation of 5.6 days. Estimates and 95% confidence intervals for parameters  $r$  and  $p$  are also shown.

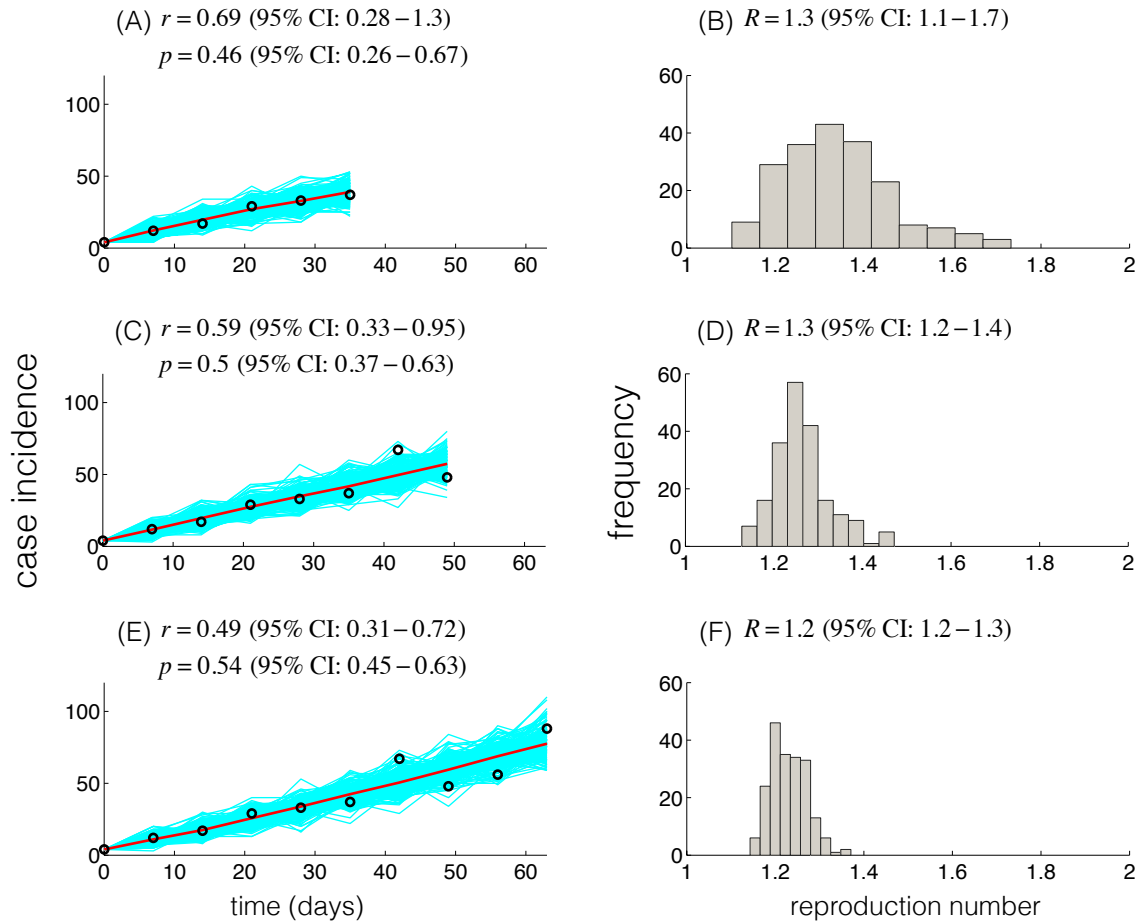

## References

1. Viboud C, Simonsen L, Chowell G. A generalized-growth model to characterize the early ascending phase of infectious disease outbreaks *Epidemics* **2016**; 15:27–37.
